# Supplementary material
Source: PubMed Central journal article supplement (PMC3183401)
Supplement: NIHMS311435-supplement-1.pdf [file NIHMS311435-supplement-1.pdf]

## Supplementary Information

### Neuronal activity modifies DNA methylation landscape in the adult brain

Junjie U. Guo<sup>1,2</sup>, Dengke K. Ma<sup>1,3</sup>, Huan Mo<sup>4</sup>, Madeleine P. Ball<sup>5</sup>, Mi-Hyeon Jang<sup>1,3</sup>, Michael A. Bonaguidi<sup>1,3</sup>, Jacob A. Balazer<sup>6</sup>, Hugh L. Eaves<sup>4</sup>, Bin Xie<sup>7</sup>, Eric Ford<sup>8</sup>, Kun Zhang<sup>9</sup>, Guo-li Ming<sup>1,2,3</sup>, Yuan Gao<sup>1,7\*</sup> and Hongjun Song<sup>1,2,3\*</sup>

<sup>1</sup>Institute for Cell Engineering, <sup>2</sup>The Solomon H. Snyder Department of Neuroscience, <sup>3</sup>Department of Neurology, Johns Hopkins University School of Medicine, Baltimore, Maryland, USA.

<sup>4</sup>Center for the Study of Biological Complexity, Virginia Commonwealth University, Richmond, Virginia, USA.

<sup>5</sup>Department of Genetics, Harvard Medical School, Cambridge, Massachusetts, USA.

<sup>6</sup>Proofpoint Inc., Sunnyvale, California, USA.

<sup>7</sup>Division of Genomics, Epigenomics and Bioinformatics, Lieber Institute for Brain Development, Baltimore, Maryland, USA.

<sup>8</sup>Department of Radiation Oncology, Johns Hopkins University School of Medicine, Baltimore, Maryland, USA.

<sup>9</sup>Department of Bioengineering, University of California at San Diego, La Jolla, California, USA.

#### Contents:

Supplementary Table list (Table 1-9)

Supplementary Figures 1-22

**Supplementary Table 1. MSCC Illumina sequencing statistics.**

| Sample      | Number of reads (total clusters) | Number of reads with appropriate adaptors | Number of mapped reads (percentage) | Number of CpG seen at least once | Average number of reads per CpG |
|-------------|----------------------------------|-------------------------------------------|-------------------------------------|----------------------------------|---------------------------------|
| E0-Hpall    | 24,020,396                       | 17,438,434                                | 12,658,706 (72.6%)                  | 947,711                          | 5.32                            |
| E0-Inverse  | 26,334,571                       | 19,990,984                                | 10,590,651 (53.0%)                  | 1,006,501                        | 4.45                            |
| E4-Hpall    | 37,041,806                       | 28,062,204                                | 21,162,529 (75.4%)                  | 1,051,884                        | 8.89                            |
| E4-Inverse  | 36,840,566                       | 26,105,312                                | 13,036,913 (49.9%)                  | 1,003,625                        | 5.48                            |
| E24-Hpall   | 24,645,278                       | 19,158,832                                | 14,226,530 (78.0%)                  | 997,306                          | 5.98                            |
| E24-Inverse | 26,161,826                       | 18,235,578                                | 10,000,964 (54.8%)                  | 967,606                          | 4.20                            |

**Supplementary Table 2. Primer sets used for bisulfite sequencing analysis of selected CpGs.** (Excel file: Table S2)

**Supplementary Table 3. Primer sets used for Hpall-qPCR analysis of selected CpGs.** (Excel file: Table S3)

**Supplementary Table 4. MSCC results for all MSCC30+ sites.** (Excel file: Table-S4)

**Supplementary Table 5. List of repetitive sequences examined for CpG methylation changes.** (Excel file: Table S5)

**Supplementary Table 6. Mouse exon array expression profiles of dentate granule cells at E0 and E4.** (Excel file: Table S6)

**Supplementary Table 7. Expression profiles of genes associated with activity-modified CpGs.** (Excel file: Table S7)

**Supplementary Table 8. Primer sets and results of q-PCR analysis of promoter CpG changes-associated genes.** (Excel file: Table S8)

**Supplementary Table 9. Functional pathways that contain activity-modified CpGs.** (Excel file: Table S9)

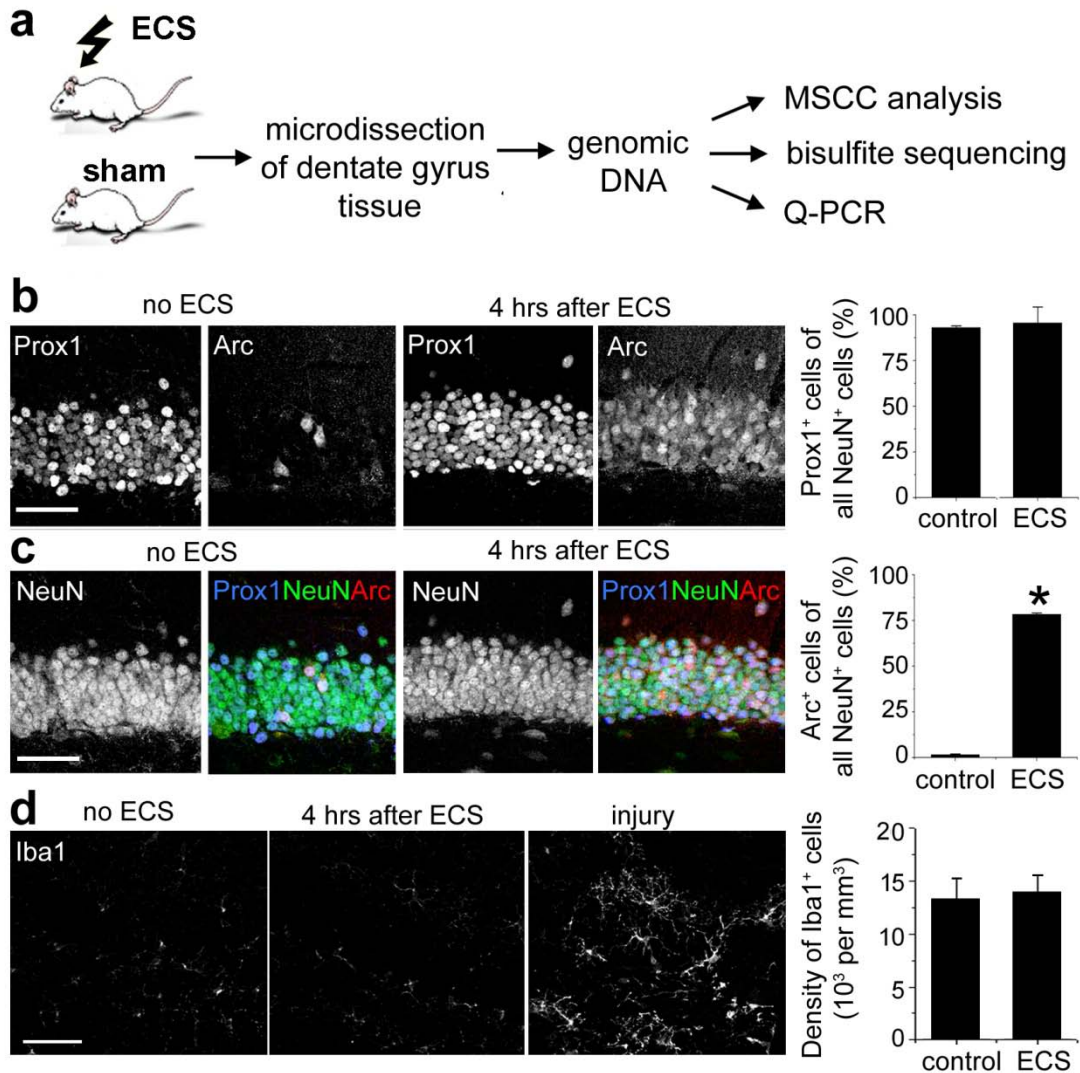

**Supplementary Figure 1.** Analysis of activity-induced DNA methylation changes in the dentate gyrus of adult mice. **(a)** A schematic diagram of the experimental design. **(b-d)** Synchronous activation of dentate granule neurons in the adult brain by a single ECS. Shown are sample confocal images of immunostaining of dentate gyrus for NeuN (mature neuronal marker), Prox1 (dentate granule cell maker), Arc (immediate early gene as a marker for neuronal activation), Iba1 (microglia marker) at 0 or 4 hrs after ECS. Scale bar: 50  $\mu$ m. Also shown are quantifications of percentages of Prox1<sup>+</sup>NeuN<sup>+</sup> cells, Arc<sup>+</sup>NeuN<sup>+</sup> cells among all NeuN<sup>+</sup> cells, and stereological counting of Iba1<sup>+</sup> cells in the adult dentate gyrus. Values represent mean  $\pm$  s.e.m. (n = 3). Note that ~ 90% of NeuN<sup>+</sup> neurons in the adult dentate gyrus are Prox1<sup>+</sup> dentate granule cells **(b)**. ECS is very effective in activating NeuN<sup>+</sup> neurons *in vivo* **(c)**. In addition, ECS does not change the number of Iba1<sup>+</sup> microglia cells in the adult dentate gyrus **(d)**, nor leads to activation of microglia cells, which exhibit different morphology (such as after injury).

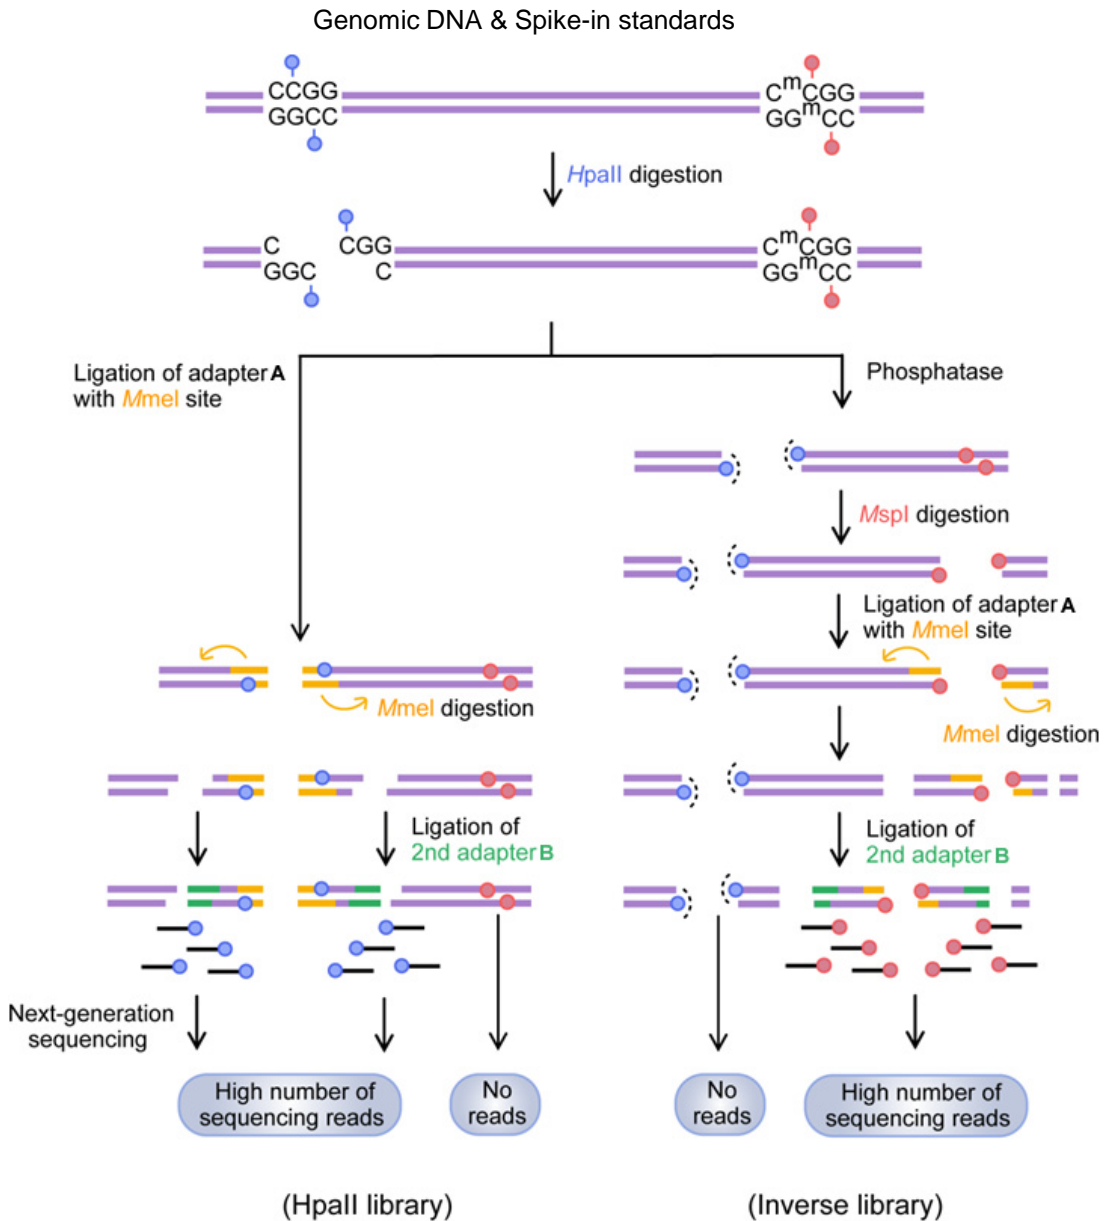

**Supplementary Figure 2.** A schematic diagram of the MSCC method for nonbiased digital profiling of the methylation status at the single nucleotide resolution across the whole genome. Methyl-sensitive Cut Counting (MSCC) profiles CpG methylation levels across the whole genome by using two restriction enzymes, the methylation-sensitive HpaII and its methylation-insensitive isoschizomer MspI. Both enzymes recognize CCGG sequences. HpaII cuts unmethylated CCGG sites, but not methylated or hydroxymethylated ones<sup>48</sup>, whereas MspI cuts all CCGG sites. Sequencing read counts matched to HpaII and MspI cutting sites provide a quantitative and digital measurement of CpG methylation levels within the CCGG sites. Detailed description of the original MSCC method can be found in ref<sup>7</sup>.

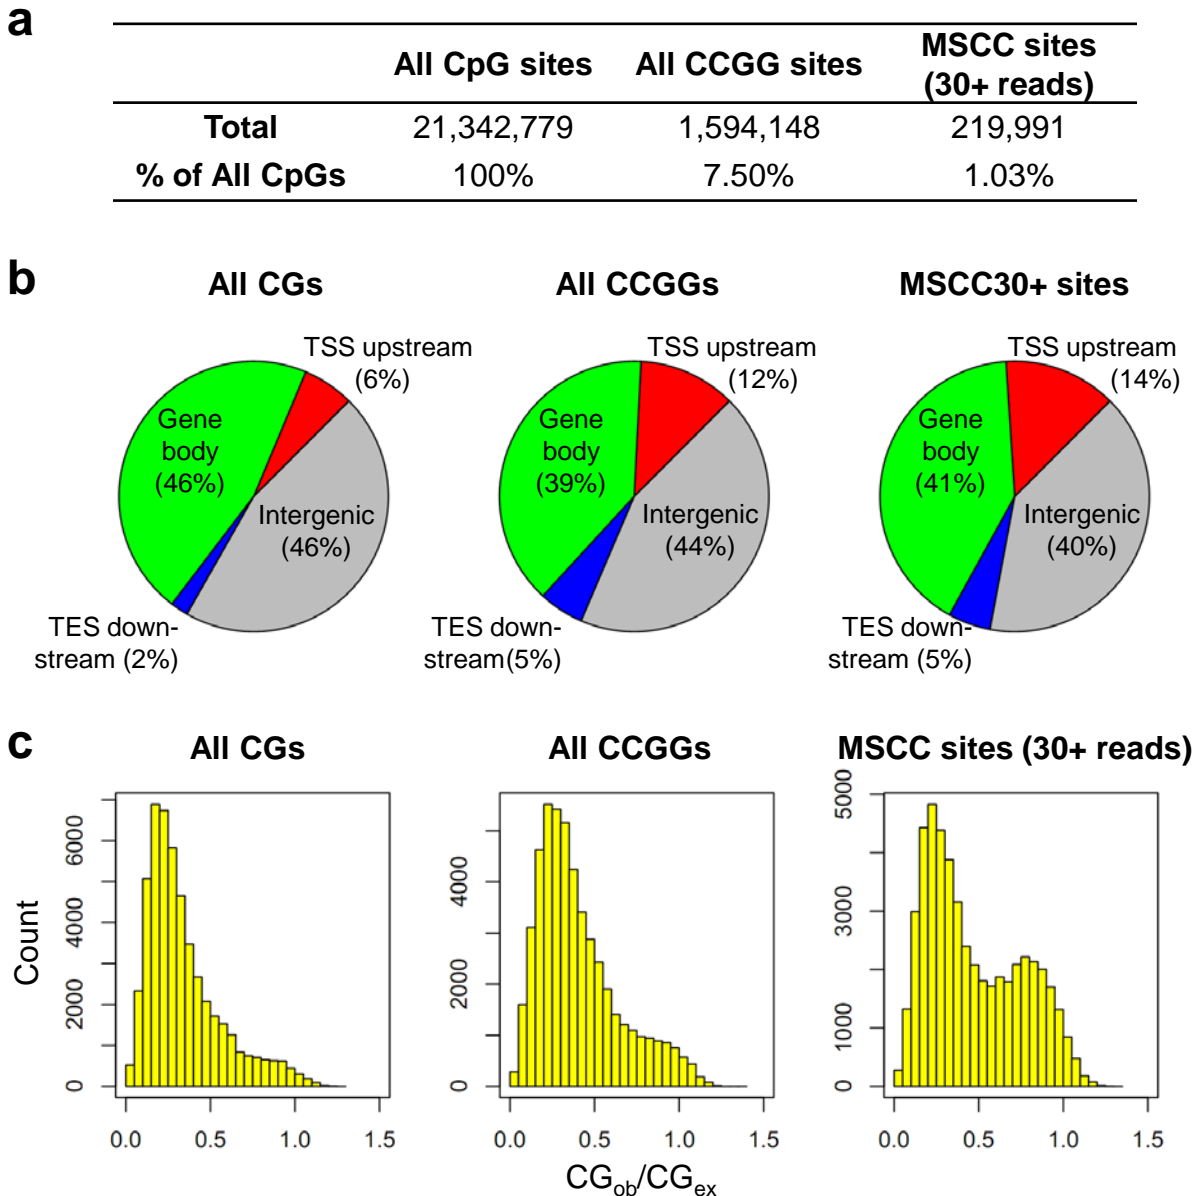

**Supplementary Figure 3.** Genomic distribution of MSCC-profiled CpGs. **(a)** A table of the number of all CG dinucleotides in the mouse genome, all CCGG sequences (MSCC site), and MSCC sites with at least 30 reads, and their percentage in all CpGs. **(b)** Percentile distribution of subsets of CpGs within different genomic subregions. TSS: transcription start site; Gene body: exons and introns; Intergenic: over 5 kb away from any known genes; TSS upstream: 5 kb upstream from the TSS; TES downstream: 5 kb downstream from the transcription end site (TES). **(c)** Distribution of local CG densities of different subsets of CpGs. Shown are histograms of counts along the ratio of observed ( $CG_{ob}$ ) over expected CG ( $CG_{ex}$ ) numbers. A total of 50,000 random sites in the mouse genome from each subset were analysed in **(b, c)**.

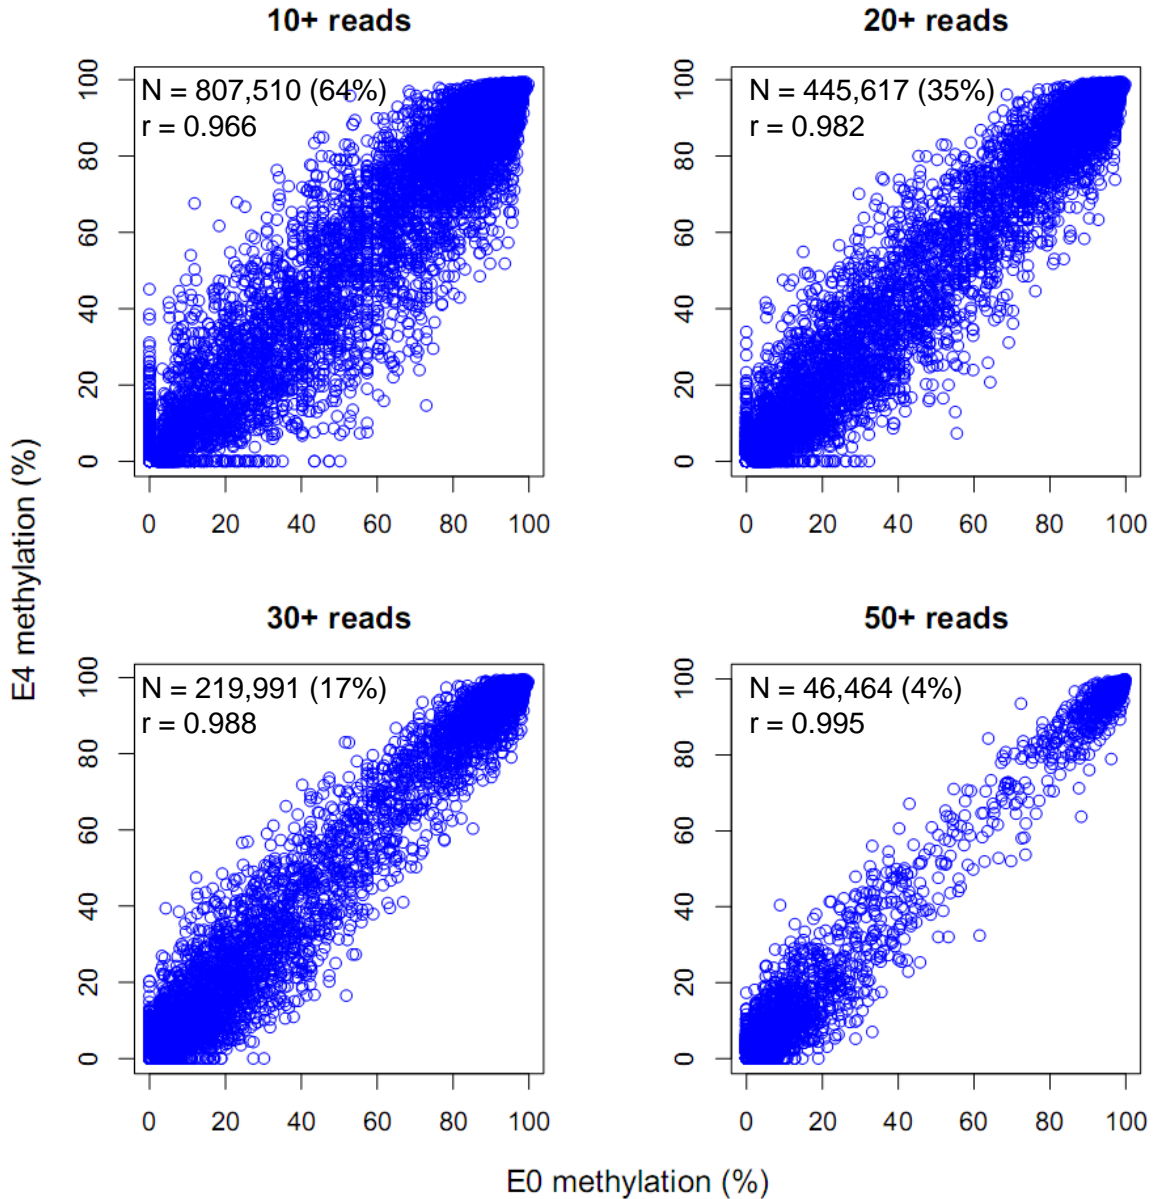

**Supplementary Figure 4.** Effect of MSCC sequencing depth on the accuracy of methylation estimates. Pair-wise comparison was performed on E0 and E4 methylation levels of 4 subsets of MSCC sites using different depth filters (10+ reads; 20+ reads; 30+ reads; 50+ reads). Also shown are total numbers of CpGs measured, their percentages in all MSCC sites (1,262,730 sites at least one read), and Pearson's correlations (r).

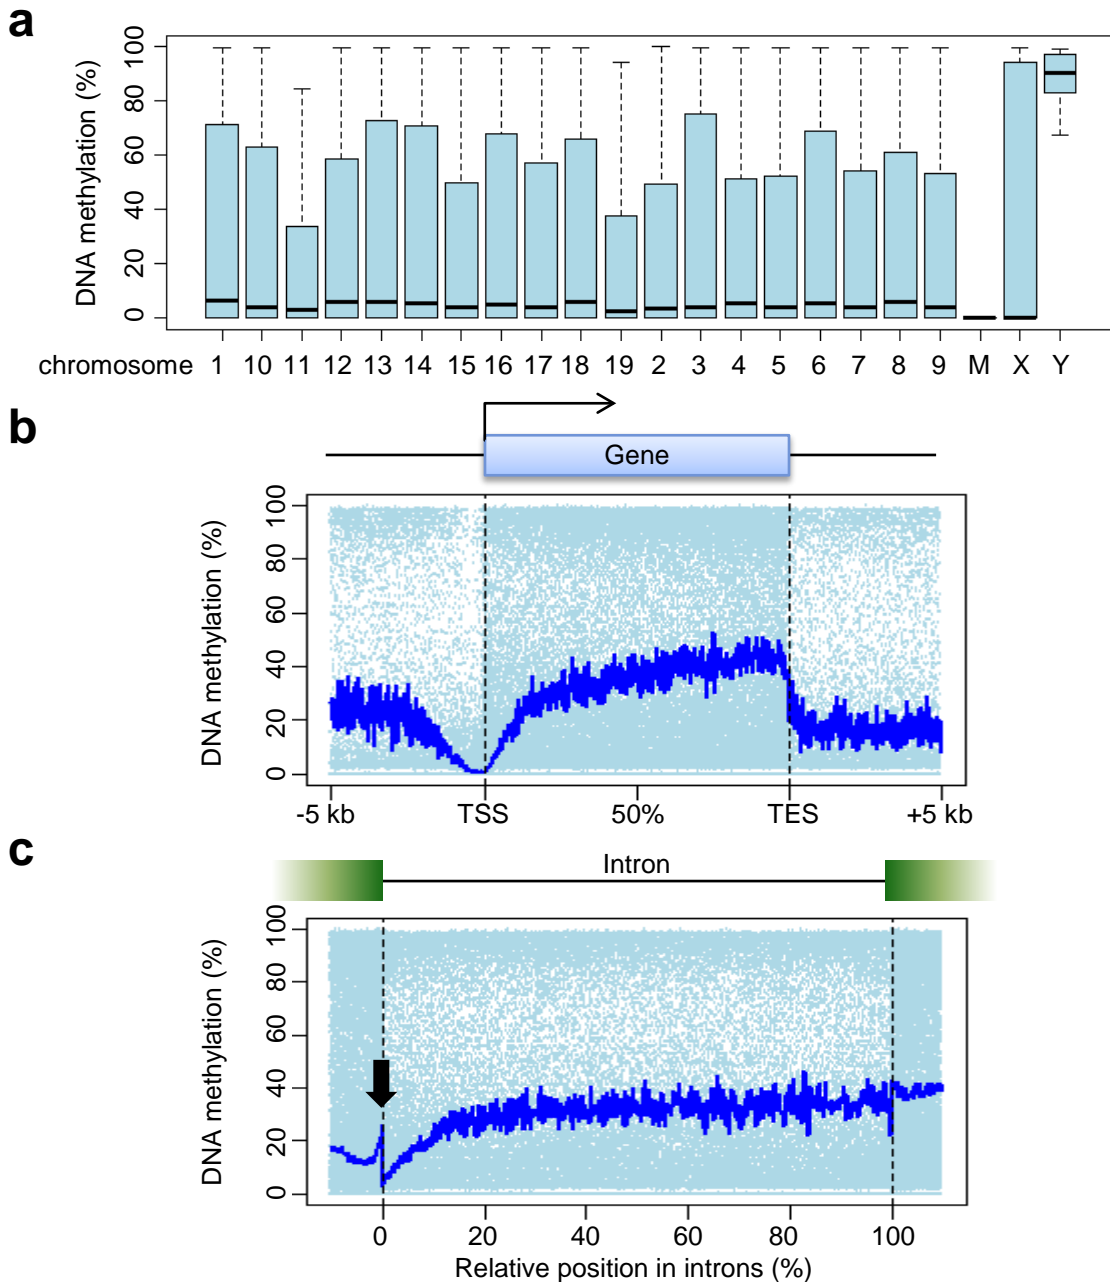

**Supplementary Figure 5.** Global properties of CpG methylation in mouse hippocampal granule neurons. **(a)** Overall methylation levels of each chromosome. Note that the mitochondrial genome (M) is almost completely unmethylated, whereas the Y chromosome is hypermethylated. **(b)** Individual CpG methylation levels are mapped to their relative location to nearby genes (cyan dots). The blue line shows the moving average. **(c)** Individual CpG methylation levels are mapped to their relative location to nearby splicing sites (cyan dots). The blue line shows the moving average. As previously reported (ref<sup>34</sup>), there is a sharp spike in methylation level at exon-intron junctions (black arrow), followed by a gradual increase in methylation levels within introns.

**a**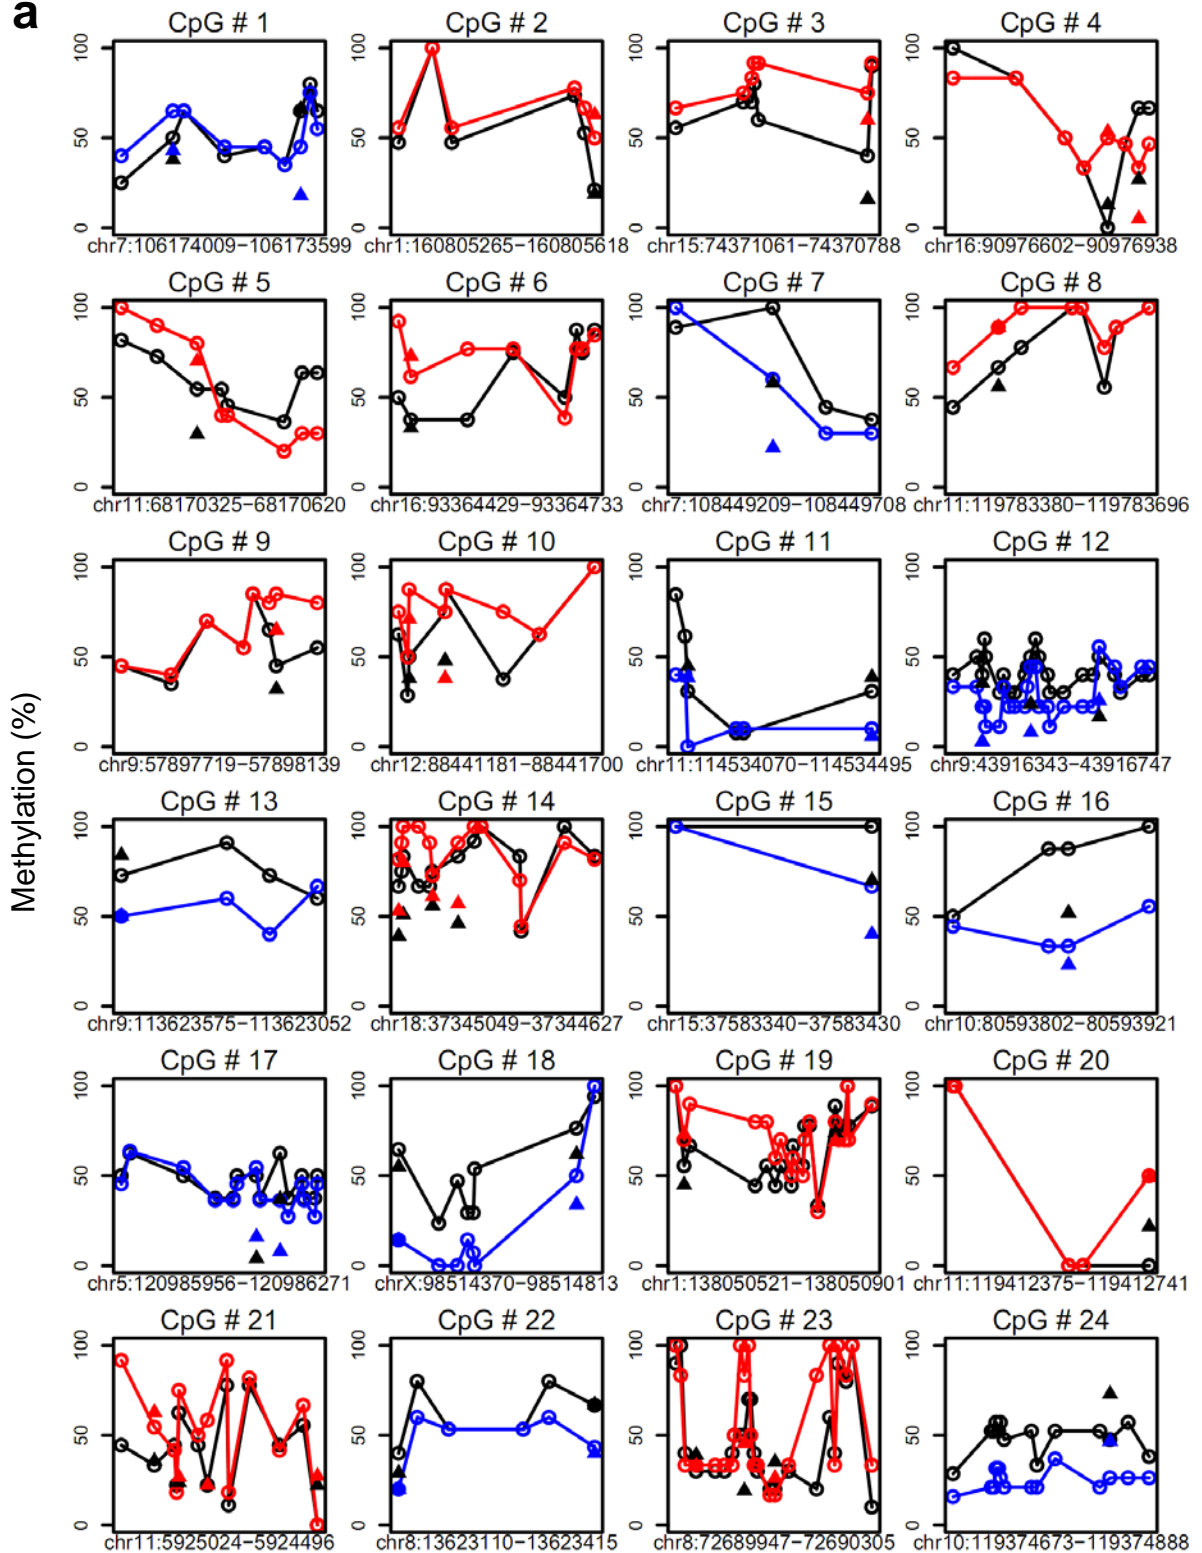



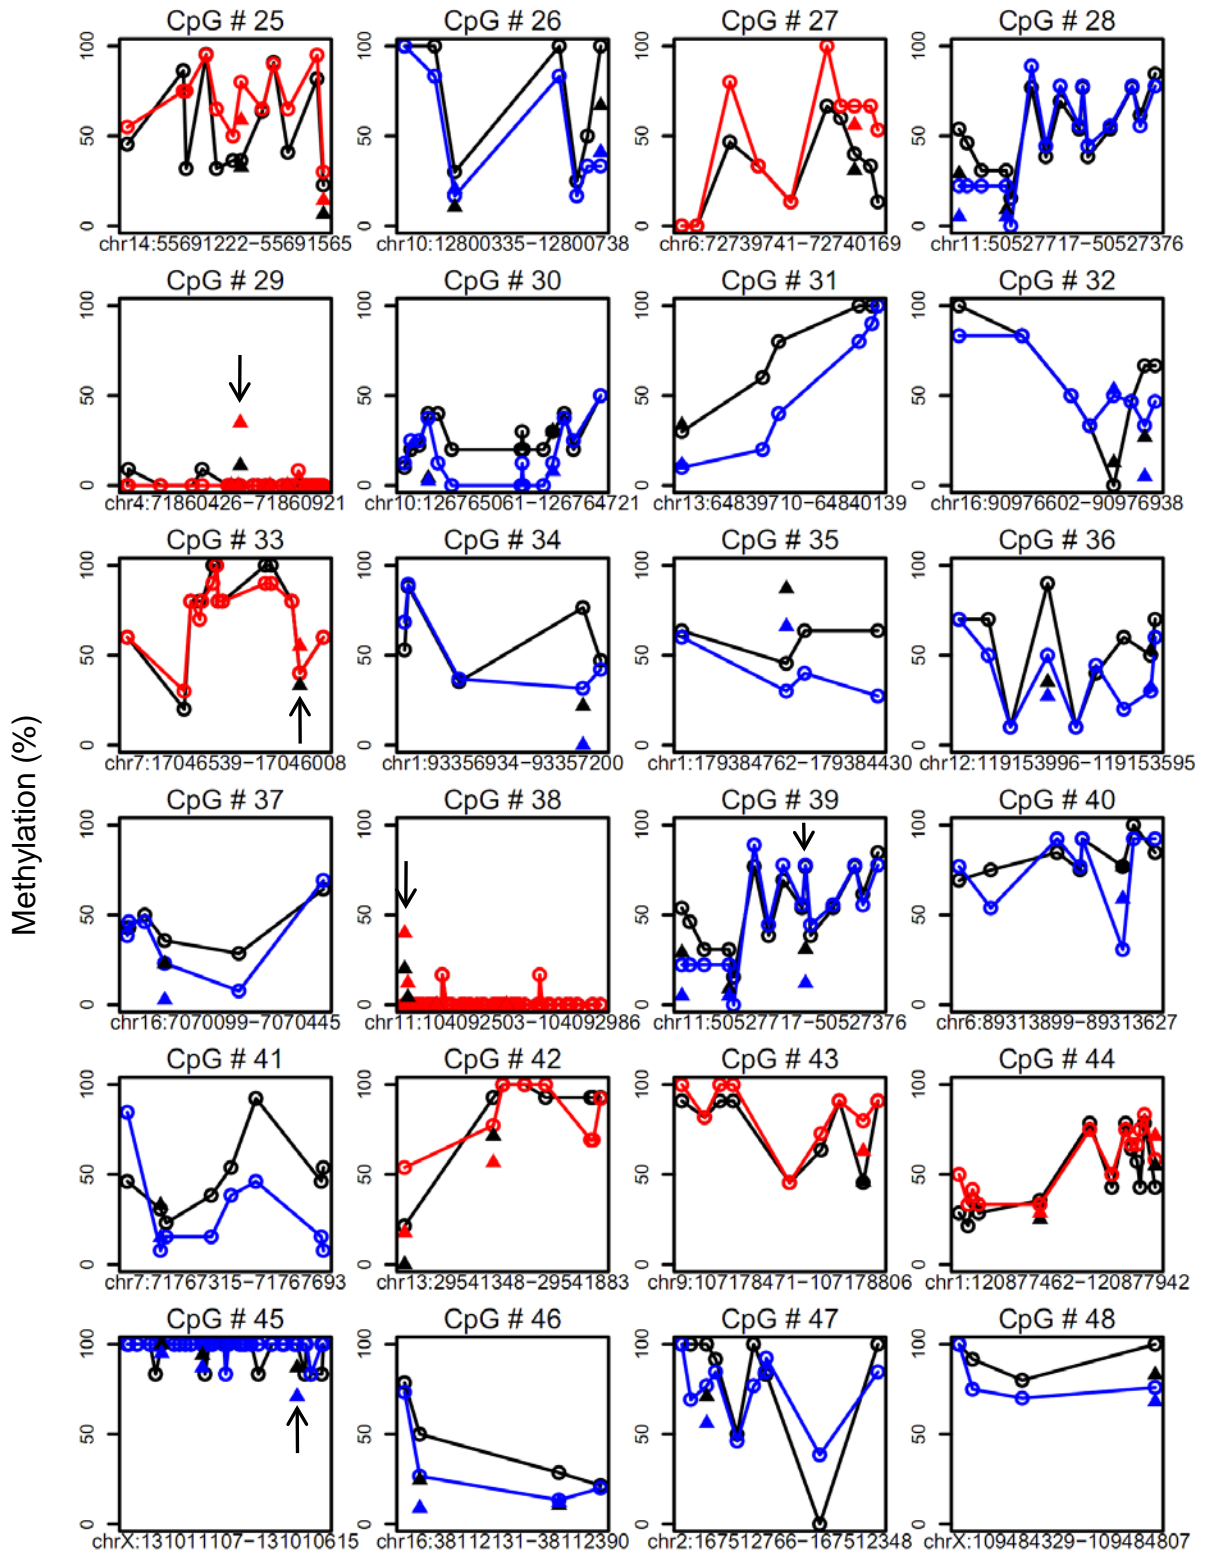

**b**

| MSCC cut-off (%) | # CpGs | Validated | Specificity (%) | Sensitivity (%) |
|------------------|--------|-----------|-----------------|-----------------|
| ± 40             | 25     | 6/6       | 100             | 13.0            |
| ± 30             | 294    | 16/16     | 100             | 32.6            |
| ± 25             | 1011   | 28/28     | 100             | 58.7            |
| ± 20             | 3050   | 35/37     | 94.6            | 76.1            |
| ± 15             | 8190   | 43/48     | 89.6            | 93.5            |

**c**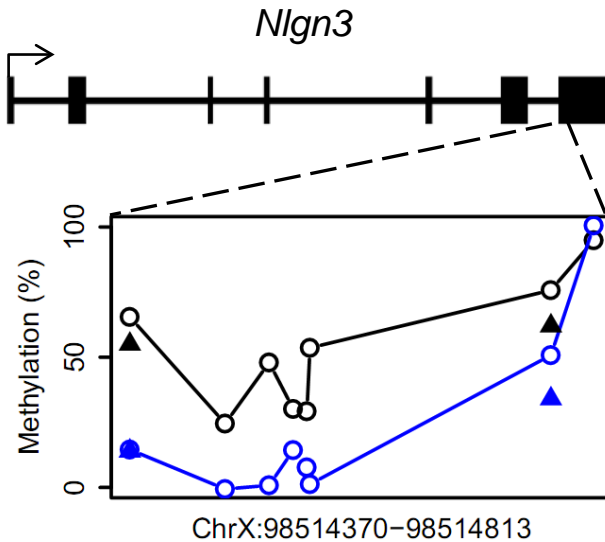

**Supplementary Figure 6.** Bisulfite sequencing validation of DNA methylation changes of selected CpGs identified by the MSCC method. **(a)** Supporting data for **Fig. 1b**. Shown are summaries of bisulfite sequencing analysis of 48 selected regions with MSCC-detected methylation changes ( $\Delta_{\text{MSCC}, \text{E4-E0}} \geq 15\%$ ). Lines show bisulfite sequencing results (black: E0; red: E4 *de novo* methylated; blue: E4 demethylated). Corresponding MSCC estimates are shown by triangles. Independent biological samples were used for MSCC analysis and bisulfite sequencing analysis. Values represent mean from  $\geq 20$  bisulfite sequencing reads for each condition from at least two animals. Arrows point to false positive sites. **(b)** A summary table of specificity and sensitivity of MSCC method to detect differential methylation levels (See formulas used for calculation in *Methods*). **(c)** Activity-induced demethylation of CpGs within the gene body of *Nlgn3* as shown by bisulfite sequencing analysis. The demethylation of two CpGs indicated from the MSCC analysis with relatively low sequencing depth ( $< 30$  reads) was validated by bisulfite sequencing analysis.

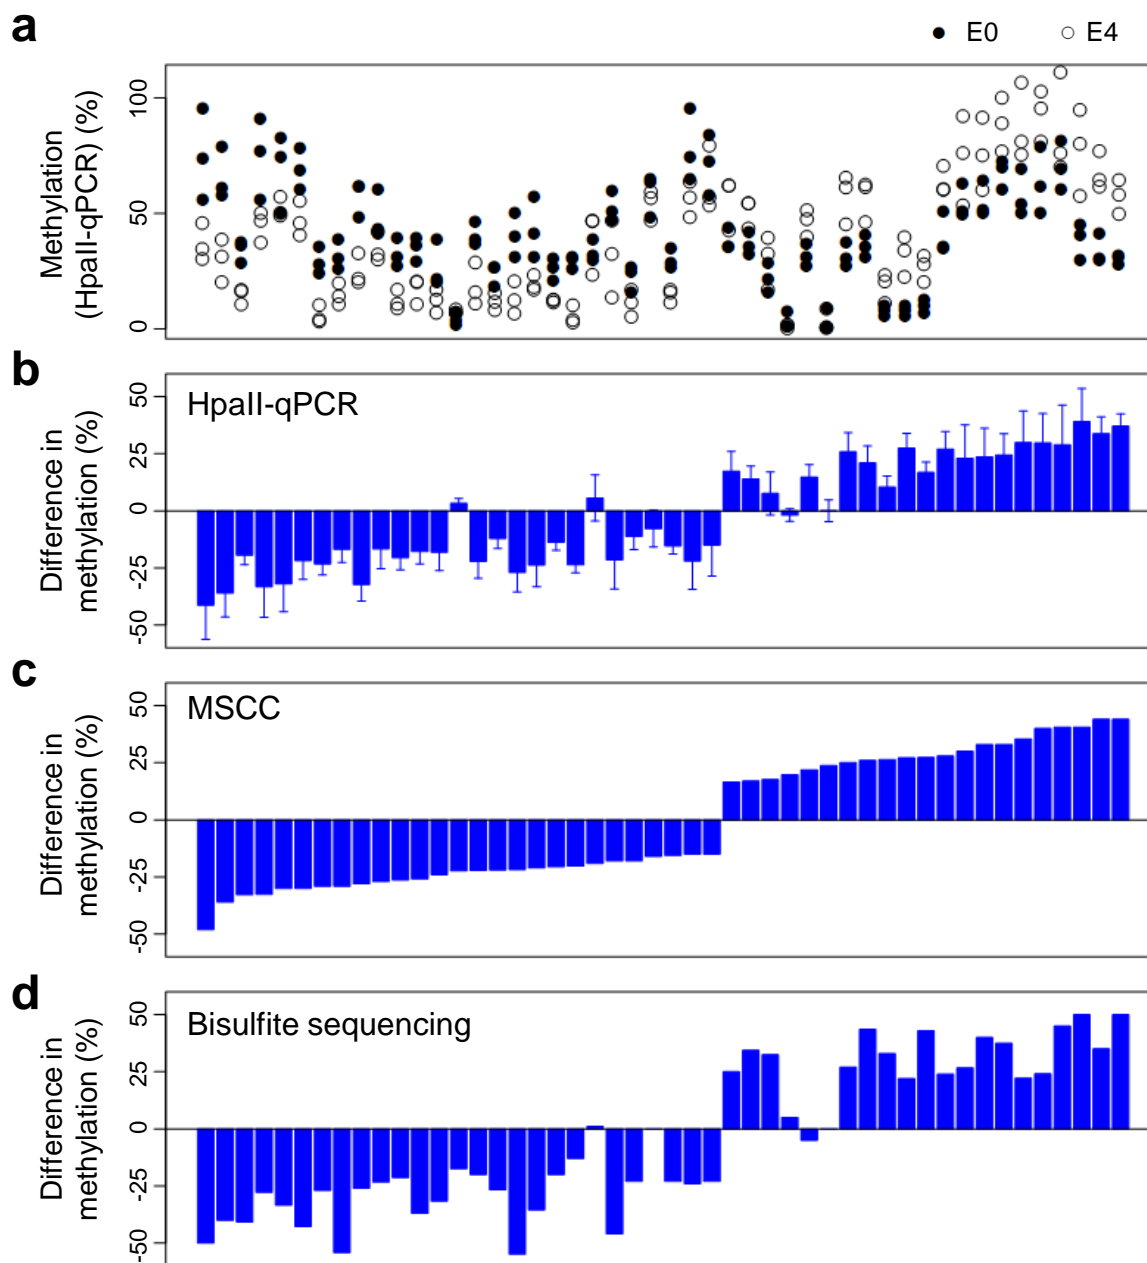

**Supplementary Figure 7.** Methylation sensitive q-PCR analysis of variability and reproducibility of methylation changes detected by MSCC method. An HpaII-based methylation-sensitive q-PCR method was used to quantify the level of DNA methylation at specific CpGs from multiple animals at E0 and at E4. **(a)** Strip plots of methylation levels of 48 CpGs of individual animals at E0 (filled circles) and at E4 (open circles). **(b)** Mean methylation differences based on HpaII-qPCR. Values represent mean  $\pm$  s.d. ( $n = 3$  animals). **(c, d)** Differences in methylation of the same CpGs as measured by MSCC and bisulfite sequencing (same data set as in **Fig. 1b** and **Supplementary Fig. 6a**).

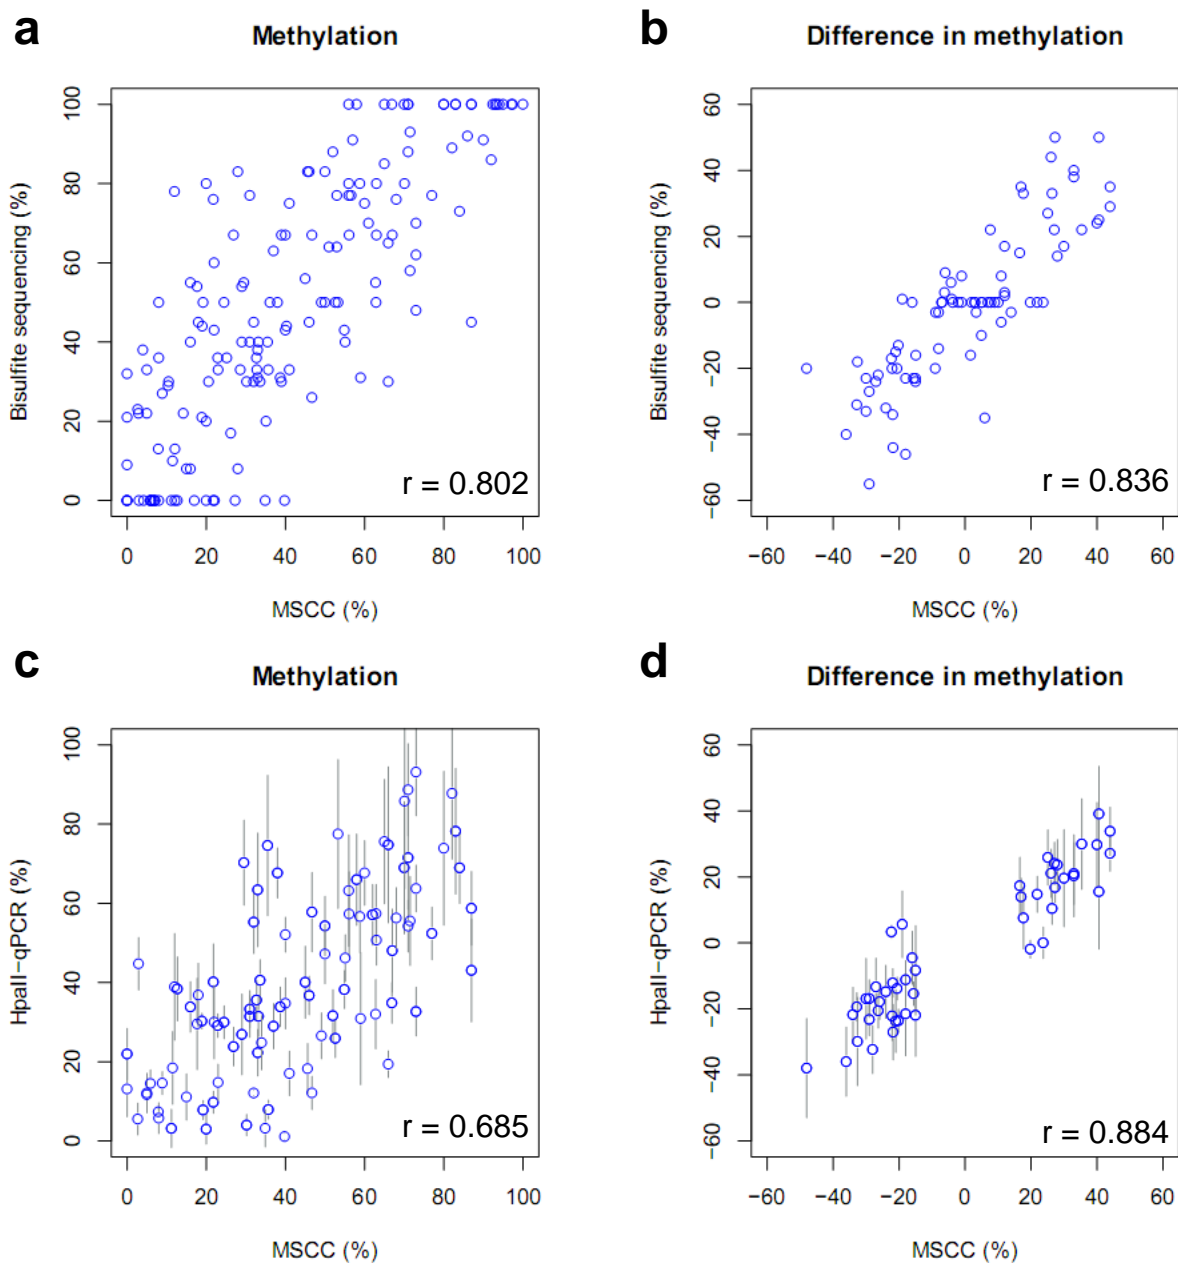

**Supplementary Figure 8.** Correlation between MSCC method and bisulfite sequencing analysis and between MSCC method and HpaII-qPCR analysis on methylation levels and differential methylation estimates. Bisulfite sequencing results of all selected CpGs at E0 and E4 (**a**), and differential methylation calculated from these results (**b**) are plotted against MSCC estimates. Similarly, HpaII-based methylation sensitive q-PCR analysis of selected CpGs (same as in **Supplementary Fig. 6**) from three individual animals at E0 and E4 each (**c**) and differential methylation calculated from these results (**d**) are plotted against MSCC estimates. Values represent mean  $\pm$  s.d. ( $n = 3$ ). Pearson's correlation ( $r$ ) is shown.

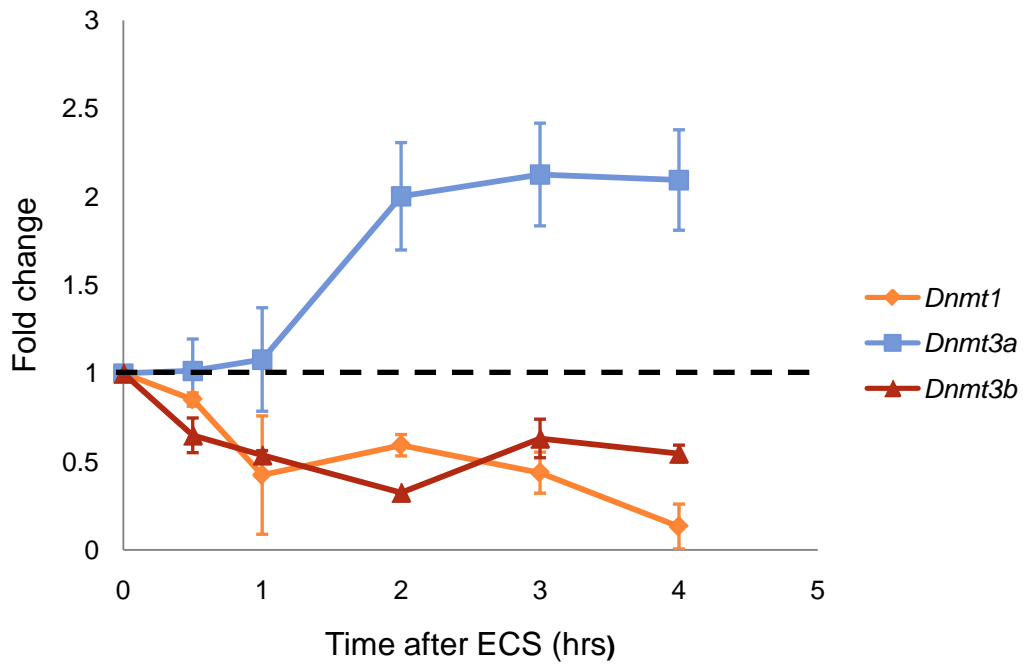

\* *Dnmt3l* was undetectable

**Supplementary Figure 9.** Time course on the expression of DNA methyltransferases (DNMTs) in the dentate gyrus of the adult mouse hippocampus before and after a single ECS. Values represent mean  $\pm$  s.d. from q-PCR analysis (n = 3).

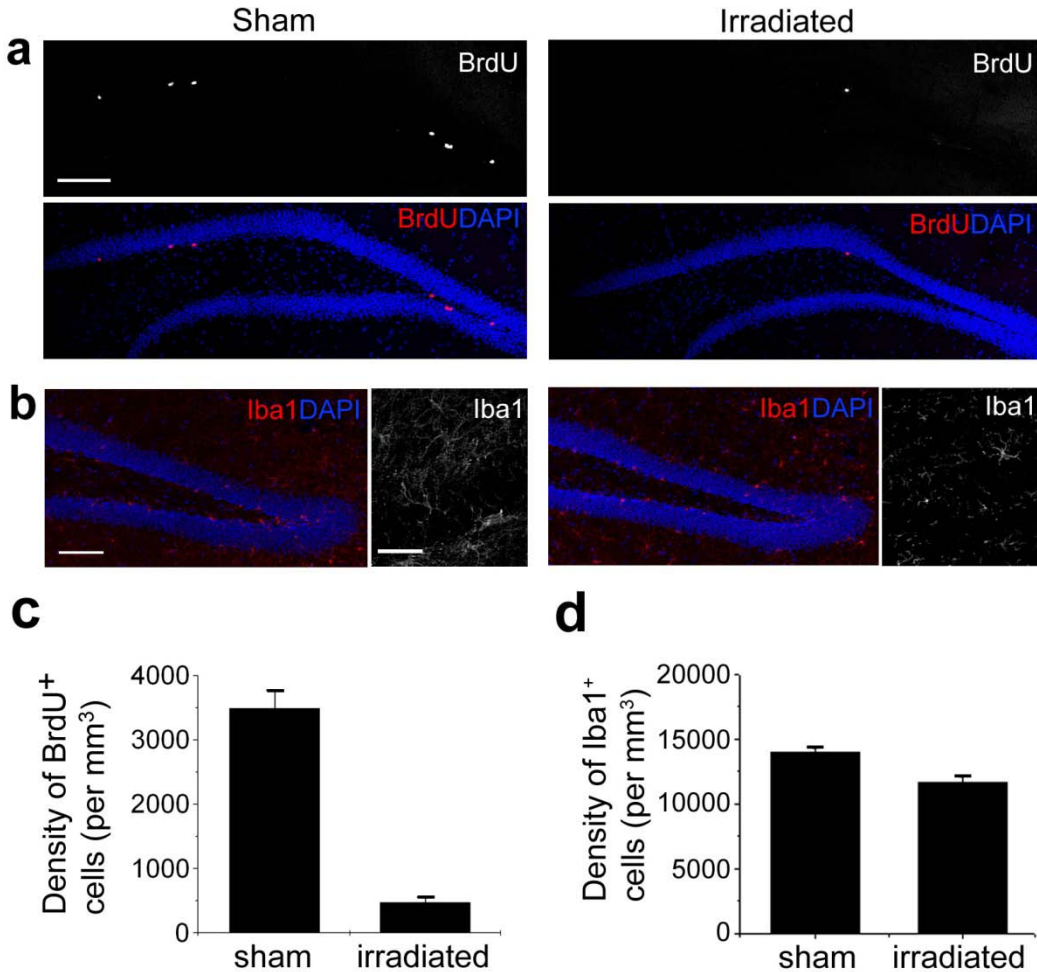

**Supplementary Figure 10.** Inhibition of cell proliferation in the dentate gyrus of adult mouse hippocampus after local irradiation. Adult male mice received targeted irradiation at hippocampal regions. At 5 weeks after irradiation they were pulsed with BrdU (200 mg/kg body weight, *i.p.*), followed by fixation 2 hrs later. Shown are sample confocal images of DAPI staining and immunostaining for BrdU (**a**) or microglia marker Iba1 (**b**) of dentate gyrus in animals with irradiation and sham control. Also shown are summaries of stereological counting of BrdU<sup>+</sup> cells (**c**) or Iba1<sup>+</sup> cells (**d**) within the dentate gyrus. Note the dramatic reduction of dividing cells, but no change in number of Iba1<sup>+</sup> microglia cells at five weeks after irradiation when methylation analysis was carried out. Scale bars: 100  $\mu\text{m}$  (**a**) and 50  $\mu\text{m}$  (**b**).

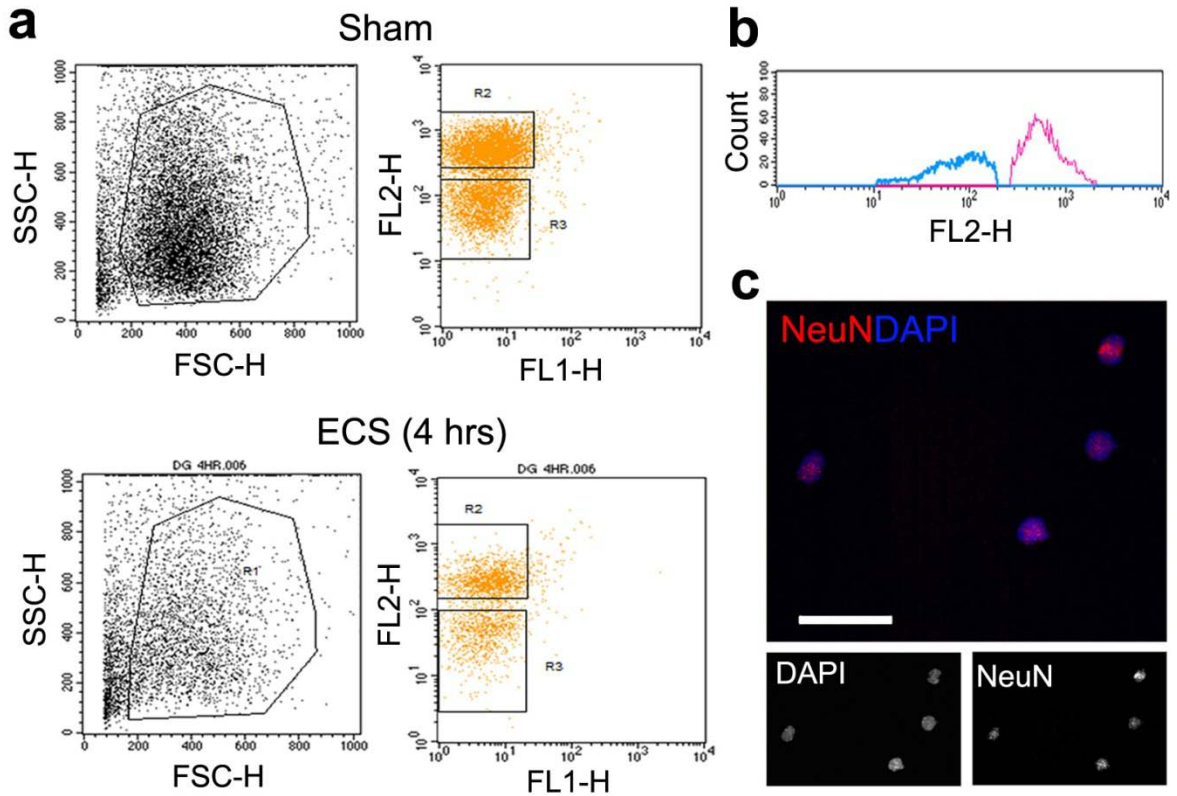

**Supplementary Figure 11.** Purification of NeuN<sup>+</sup> mature neuronal nuclei from the dentate gyrus of the adult mouse hippocampus by fluorescence activated cell sorting (FACS). Adult mice were administered ECS or sham treatment, and the dentate gyrus tissue was removed 4 hrs later. Nuclei were isolated and processed for immunostaining with the mature neuronal marker NeuN and conjugated R-PE. **(a)** Singular nuclei (R1) were separated from cell debris according to forward scatter (FSC) and side scatter (SSC) profiles for sham and ECS treated samples. The NeuN<sup>+</sup> fraction (R2) was separated according to PE levels above the negative isotype control (R3, NeuN<sup>-</sup>) in sham and ECS conditions. **(b)** Sorting profile demonstrated that the FACS gates had no overlap. **(c)** Immunofluorescence image of post-sorted samples confirmed pure NeuN<sup>+</sup> nuclei population. Scale bar: 20  $\mu$ m.

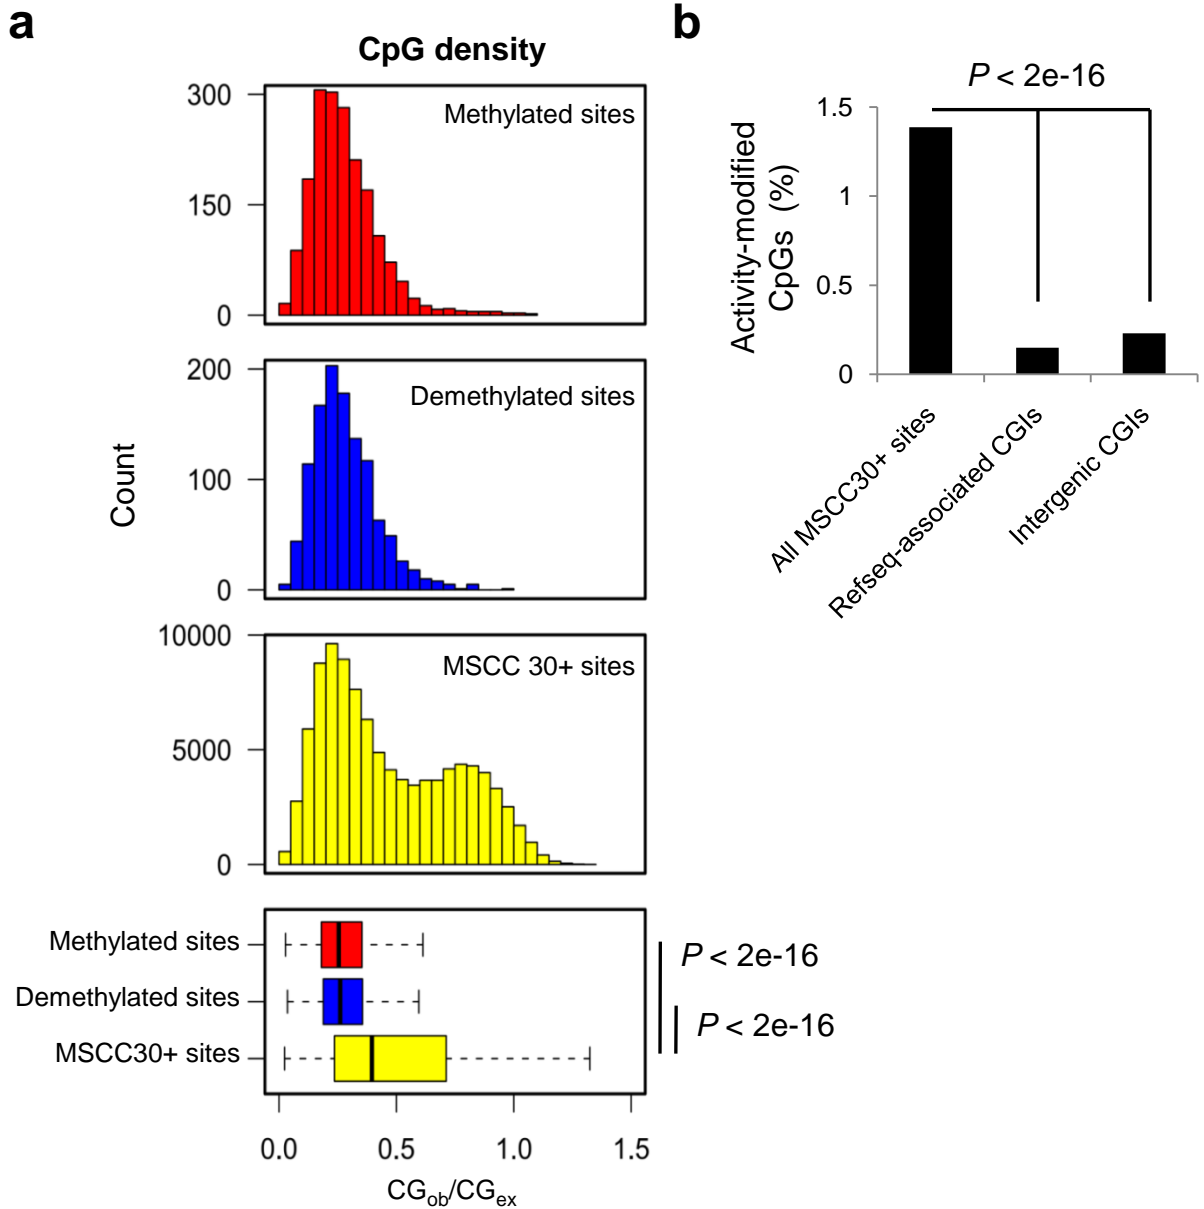

**Supplementary Figure 12.** CpGs within the low CpG density context as main targets for activity-induced demethylation and *de novo* methylation in mature neurons in the adult brain. **(a)** CpGs that are *de novo* methylated (red) or demethylated (blue) are binned by their CpG densities of 500 bp flanking regions ( $\Delta_{\text{MSCC}, E4-E0} \geq 20\%$ ), and compared to all MSCC30+ sites (random 50,000 sites were analysed). Box-plots show medians and quartiles of these 3 distributions ( $P$  values, Student's t-test). **(b)** Both gene-associated and intergenic CpG islands (CGIs; experimentally determined by Illingworth et al. ref<sup>38</sup>) are resistant to activity-induced methylation changes. Shown are percentages of MSCC30+ sites mapped within two types of CGIs that were modified ( $\geq 20\%$ ) by ECS, compared to all MSCC30+ sites ( $P$  value, chi-square test).



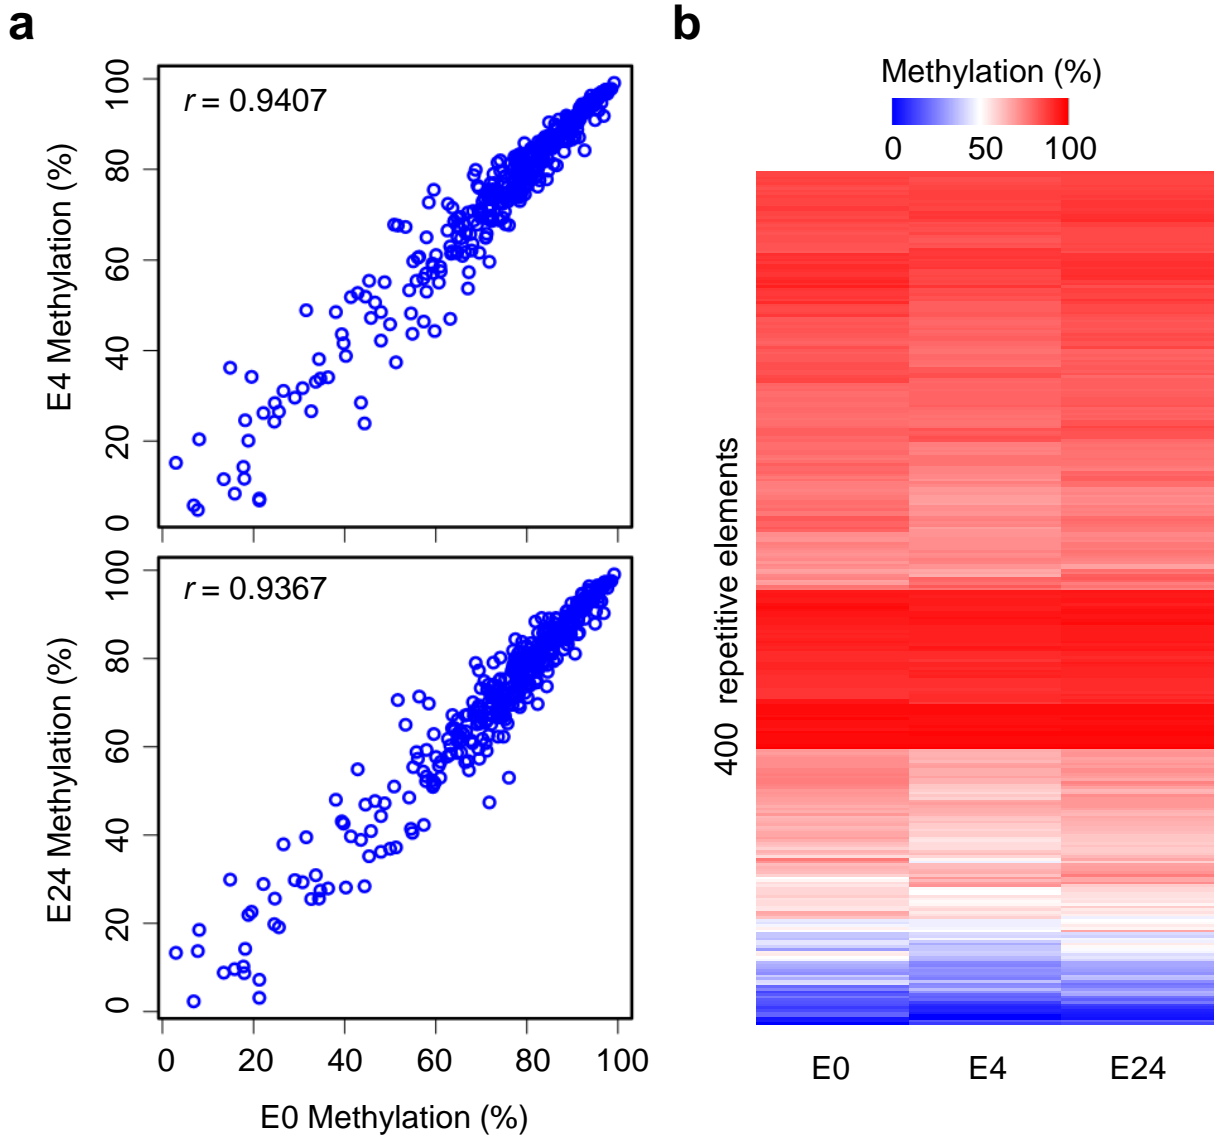

**Supplementary Figure 13.** Lack of activity-induced methylation changes for CpGs within repetitive sequences in mature neurons in the adult brain. **(a)** Scatter plots show pair-wise comparisons of methylation profiles of 400 repetitive elements at E0, E4, and E24. Pearson's  $r$  is shown. **(b)** Unsupervised clustering analysis shows highly similar patterns of repetitive element methylation levels at all time points. Note that most repetitive elements are heavily methylated.

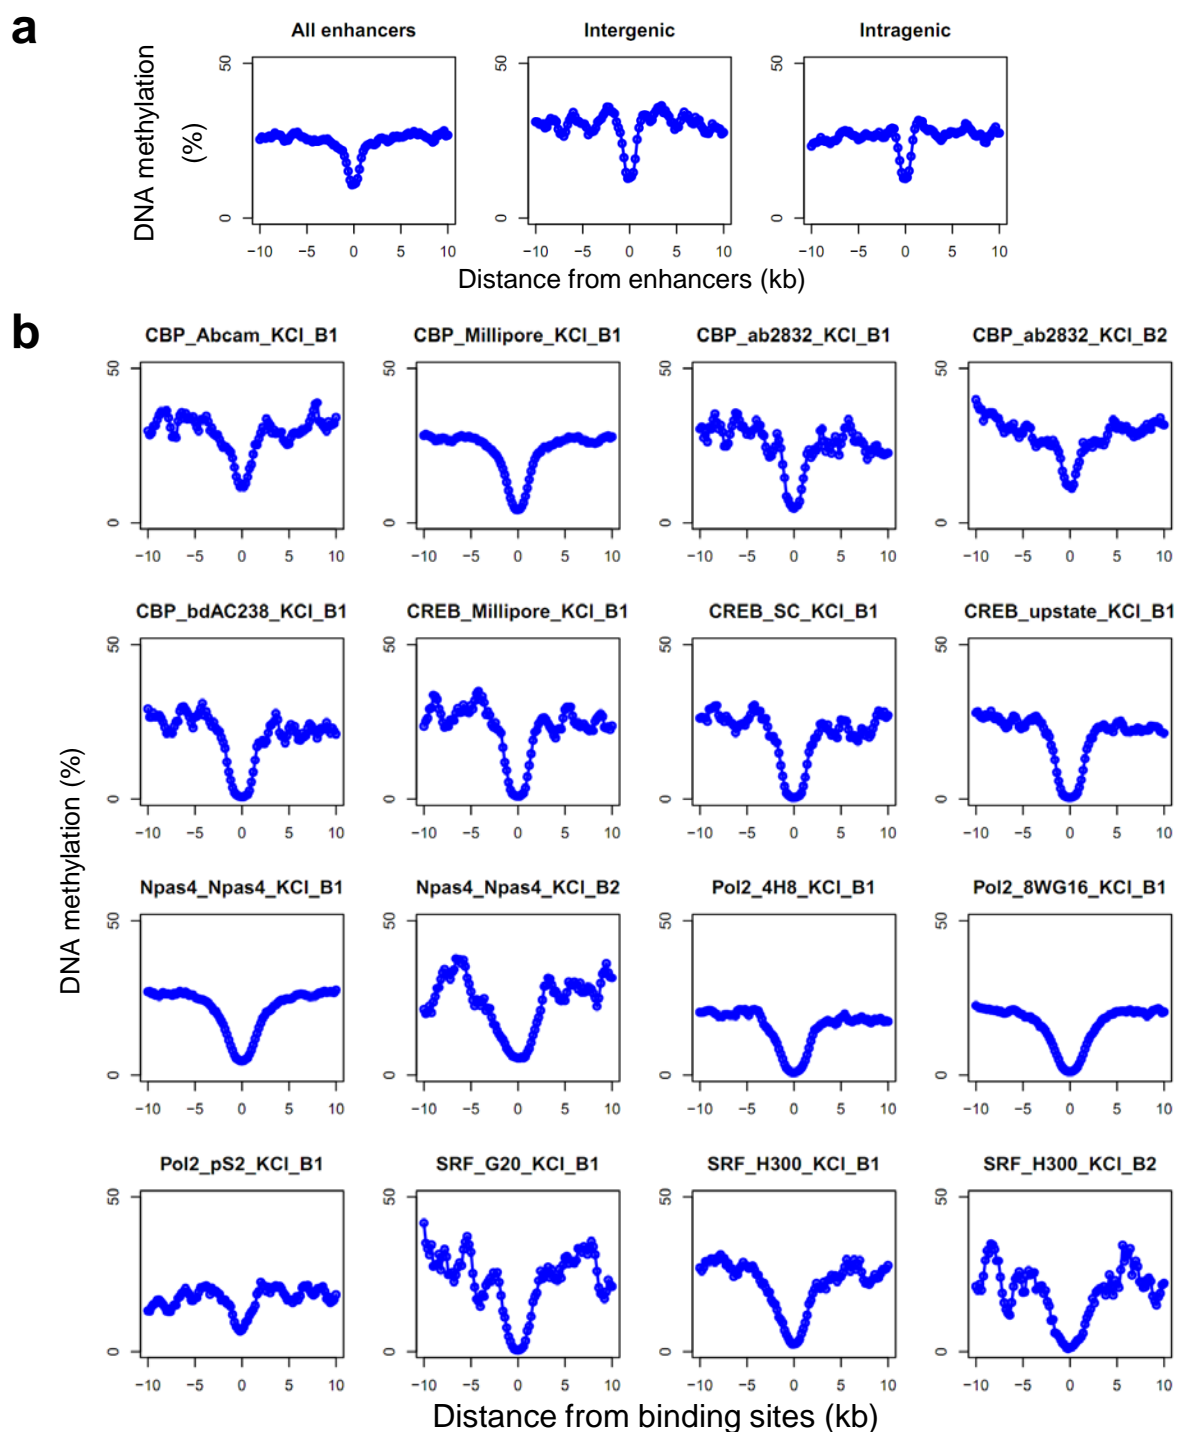

**Supplementary Figure 14.** Hypomethylation of neuronal activity-dependent enhancers and transcription factor binding sites. **(a)** Both intergenic and intragenic neuronal enhancers are hypomethylated in dentate granule neurons. **(b)** All activity-regulated transcription factor binding sites are hypomethylated in dentate granule neurons. All binding sites were profiled and neuronal enhancers were defined in Kim et al. ref<sup>41</sup>.

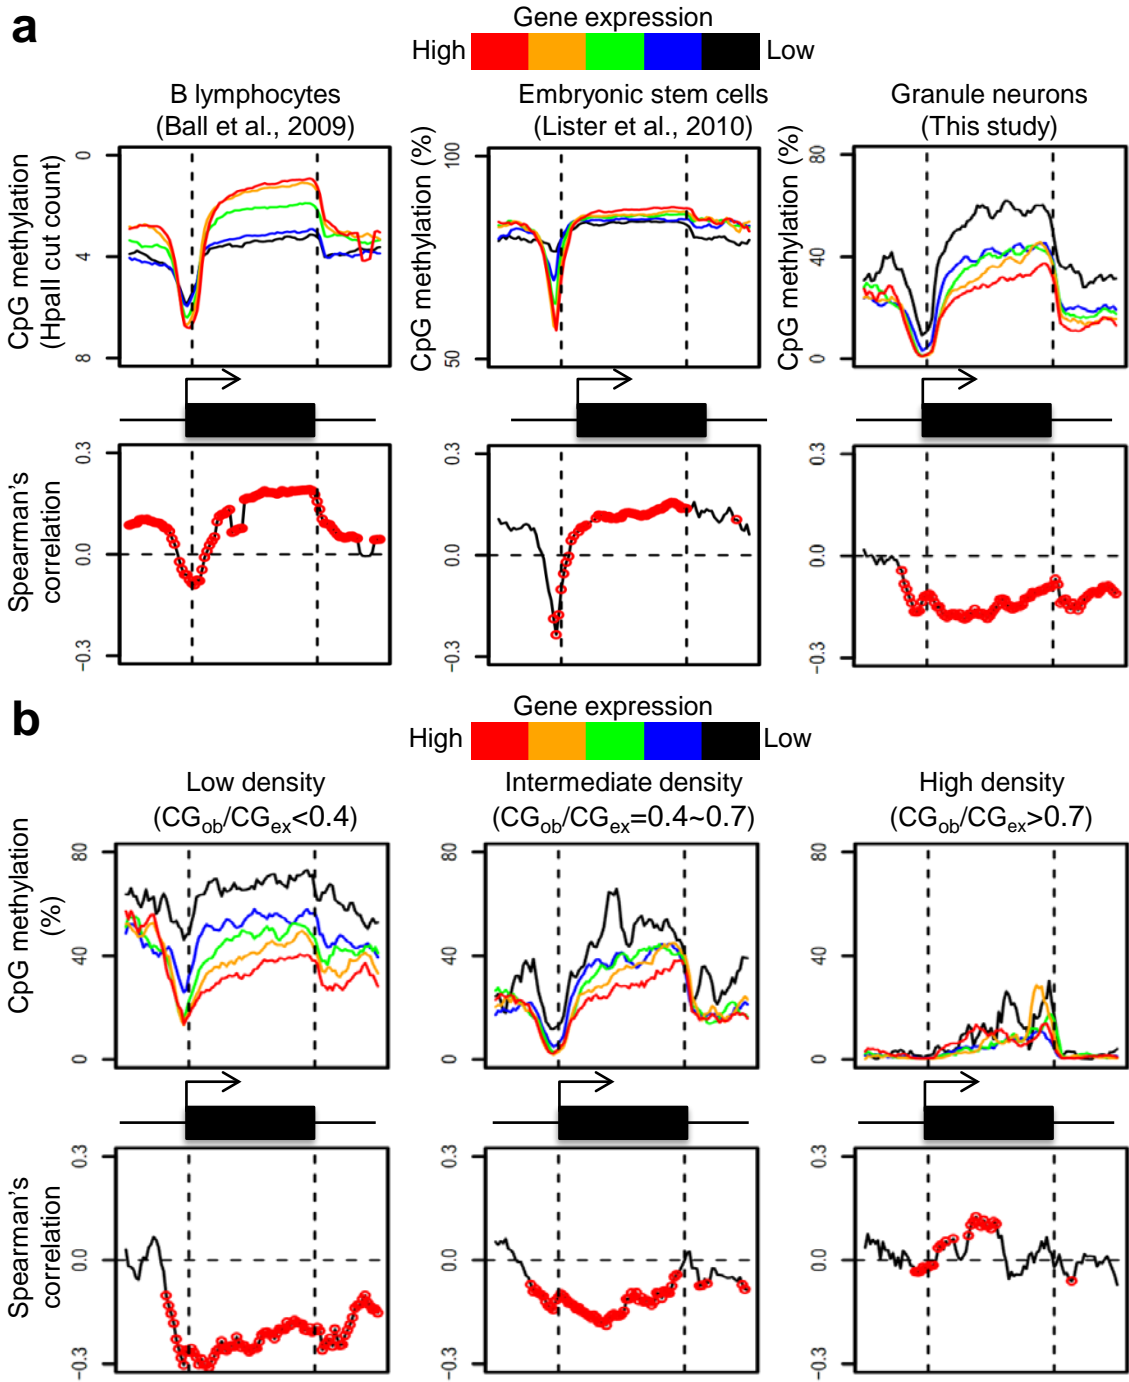

**Supplementary Figure 15.** Relationship between CpG methylation and gene expression. (a) Correlation between CpG methylation and gene expression in dentate granule neurons was compared to MSCC-profiled B lymphocytes<sup>7</sup> and MethylC-seq-profiled H1 embryonic stem cells<sup>34</sup>. Averaged methylation levels for genes expressed at different levels were shown (top). Also shown are Spearman's correlation coefficients (bottom). Dashed lines indicate TSS and TES positions. Red circles indicate observations of  $P$  values  $< 0.01$ . (b) Correlation between CpG methylation at different densities and gene expression in dentate granule neurons.

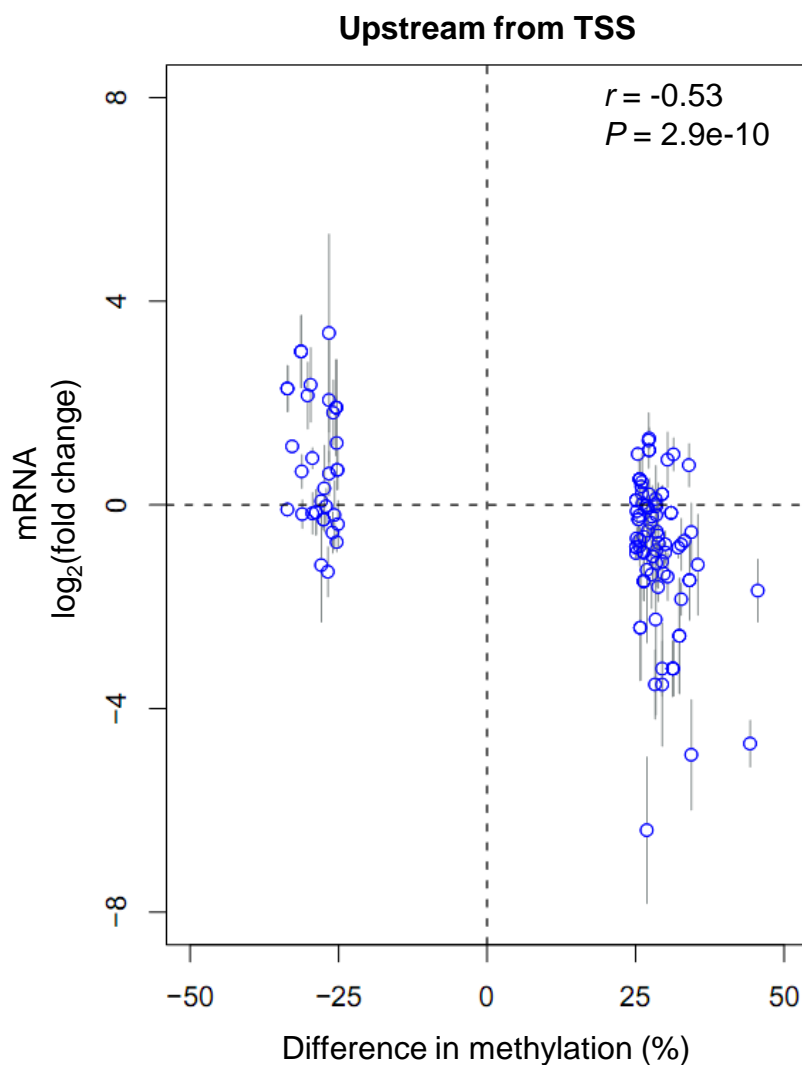

**Supplementary Figure 16.** Anti-correlation between methylation changes in TSS upstream regions and expression changes of associated genes. Shown is a plot of expression analysis of genes that exhibited methylation changes within 5 kb upstream from TSS ( $\Delta_{\text{MSCC}} \geq 25\%$ ; the same set as in **Fig. 6a** left) by q-PCR from 3 independent sets of experiments. Values represent mean  $\pm$  s.d. ( $n = 3$ ).

## Calcium signalling pathway

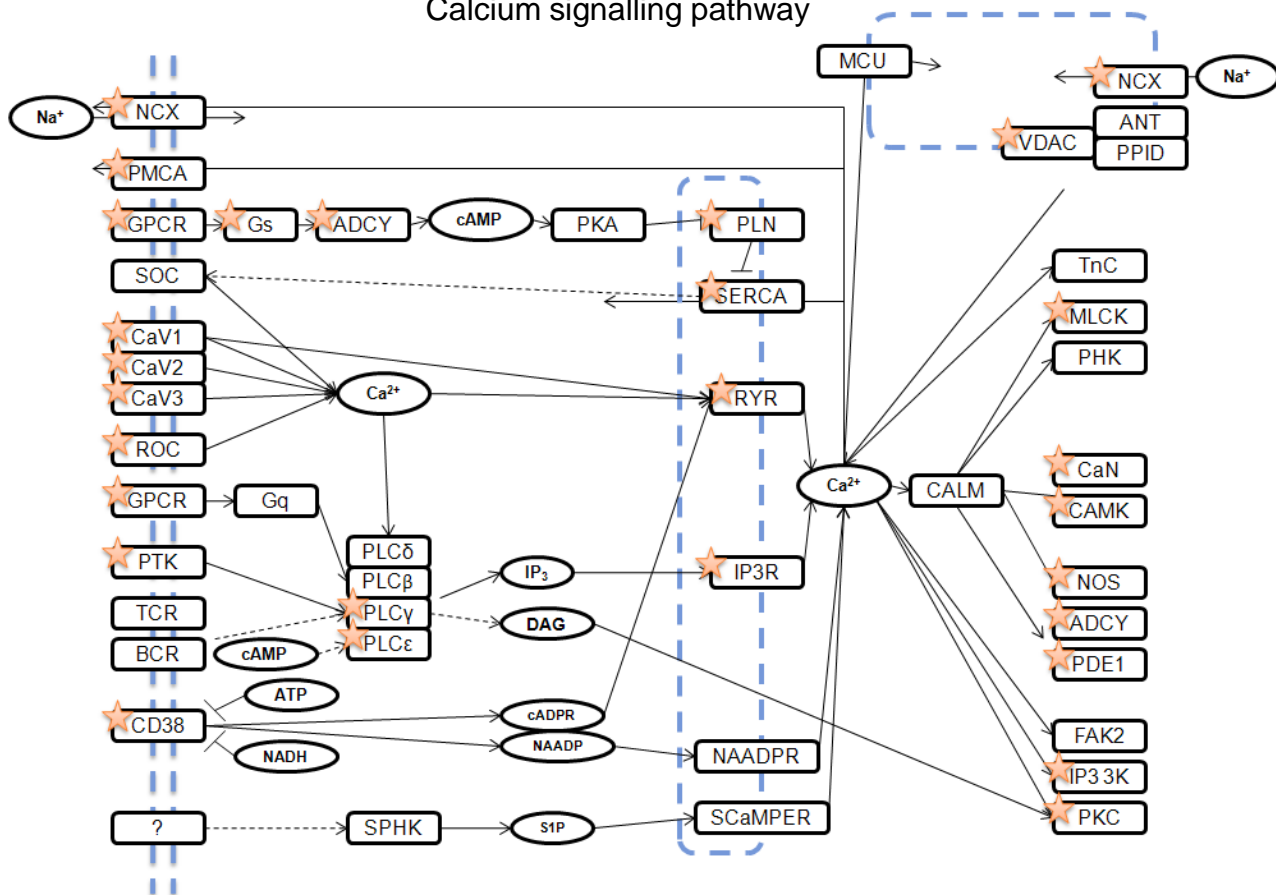

**Supplementary Figure 17.** Activity-induced methylation changes in genes associated with  $Ca^{2+}$  signalling pathway. Pathway diagrams are modified from Kyoto Encyclopedia of Genes and Genomes (KEGG). Genes that harbour activity-induced CpG methylation changes are indicated by stars.

## Nerve growth and guidance

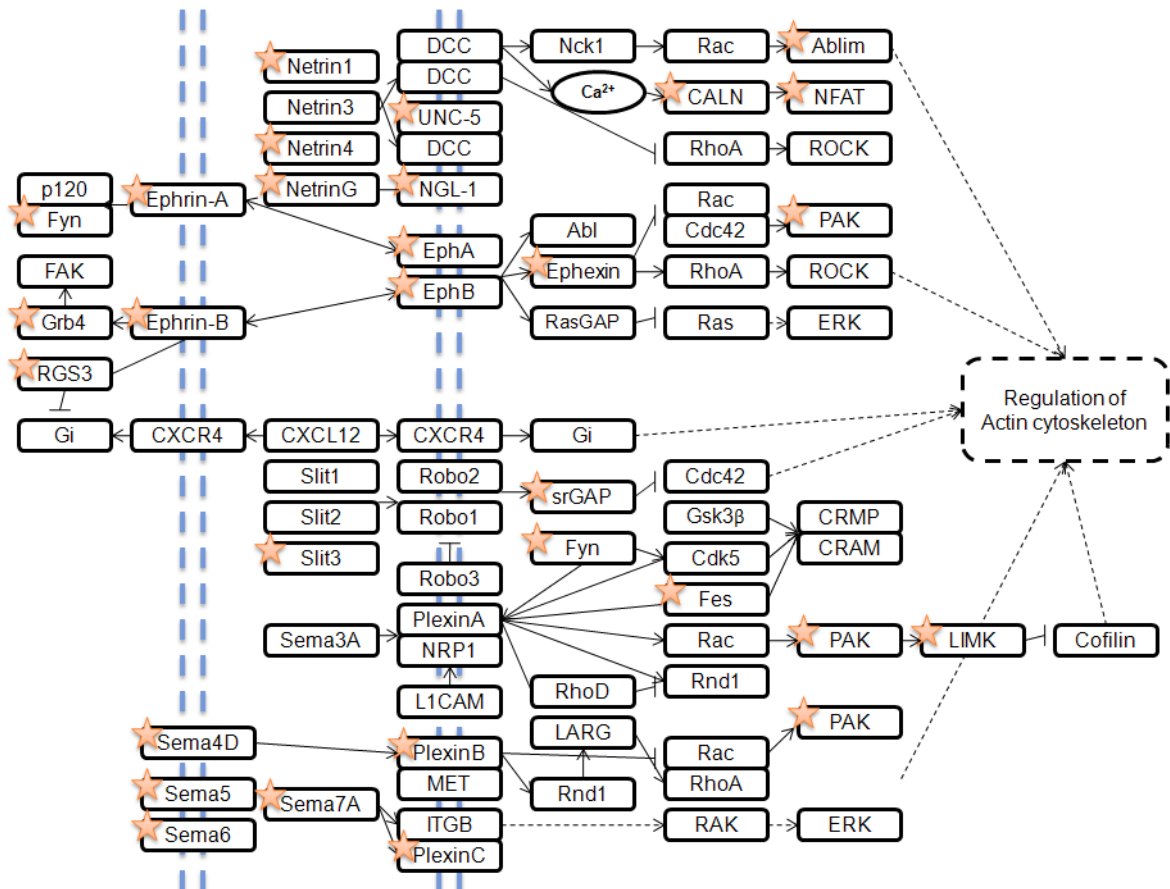

**Supplementary Figure 18.** Activity-induced methylation changes in genes associated with nerve growth and guidance pathway. Pathway diagrams are modified from Kyoto Encyclopedia of Genes and Genomes (KEGG). Genes that harbour activity-induced CpG methylation changes are indicated by stars.

## Long-term potentiation

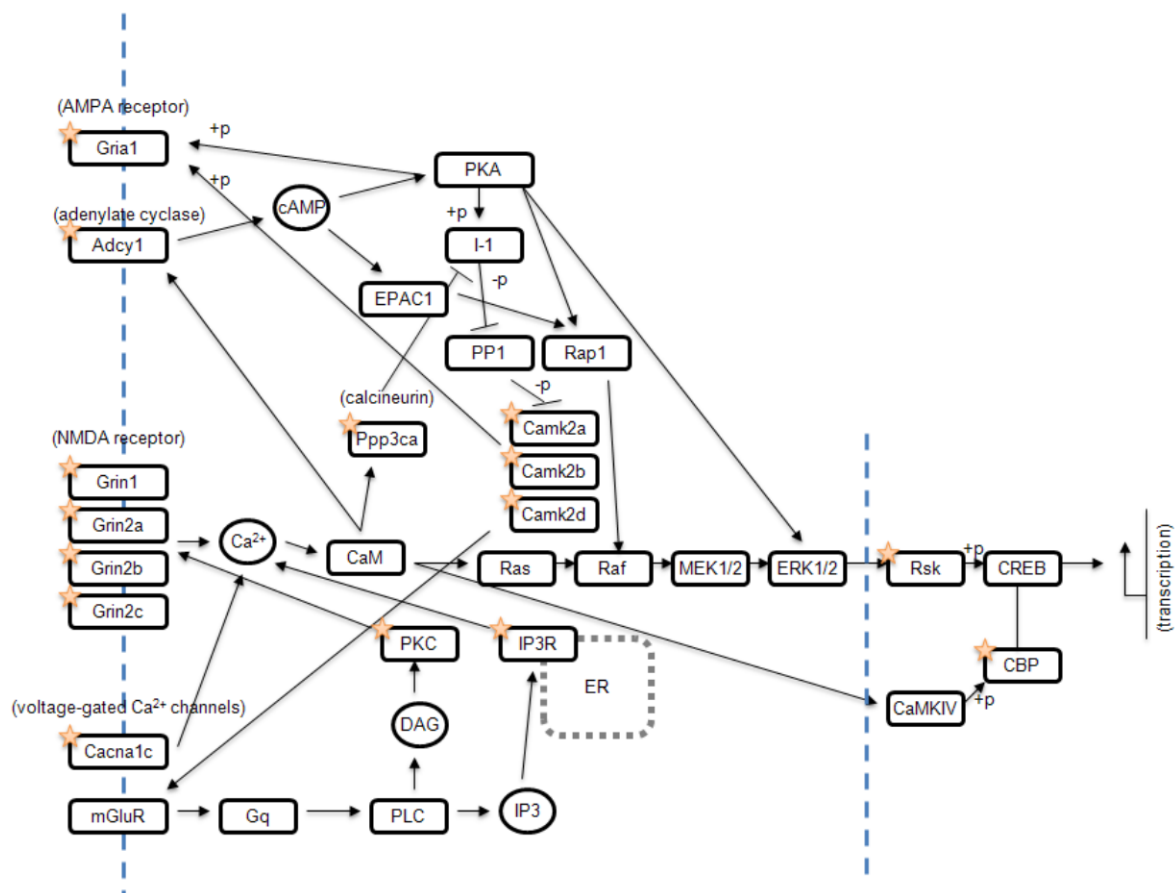

**Supplementary Figure 19.** Activity-induced methylation changes in genes associated with long-term potentiation pathways. Pathway diagrams are modified from Kyoto Encyclopedia of Genes and Genomes (KEGG). Genes that harbour activity-induced CpG methylation changes are indicated by stars.

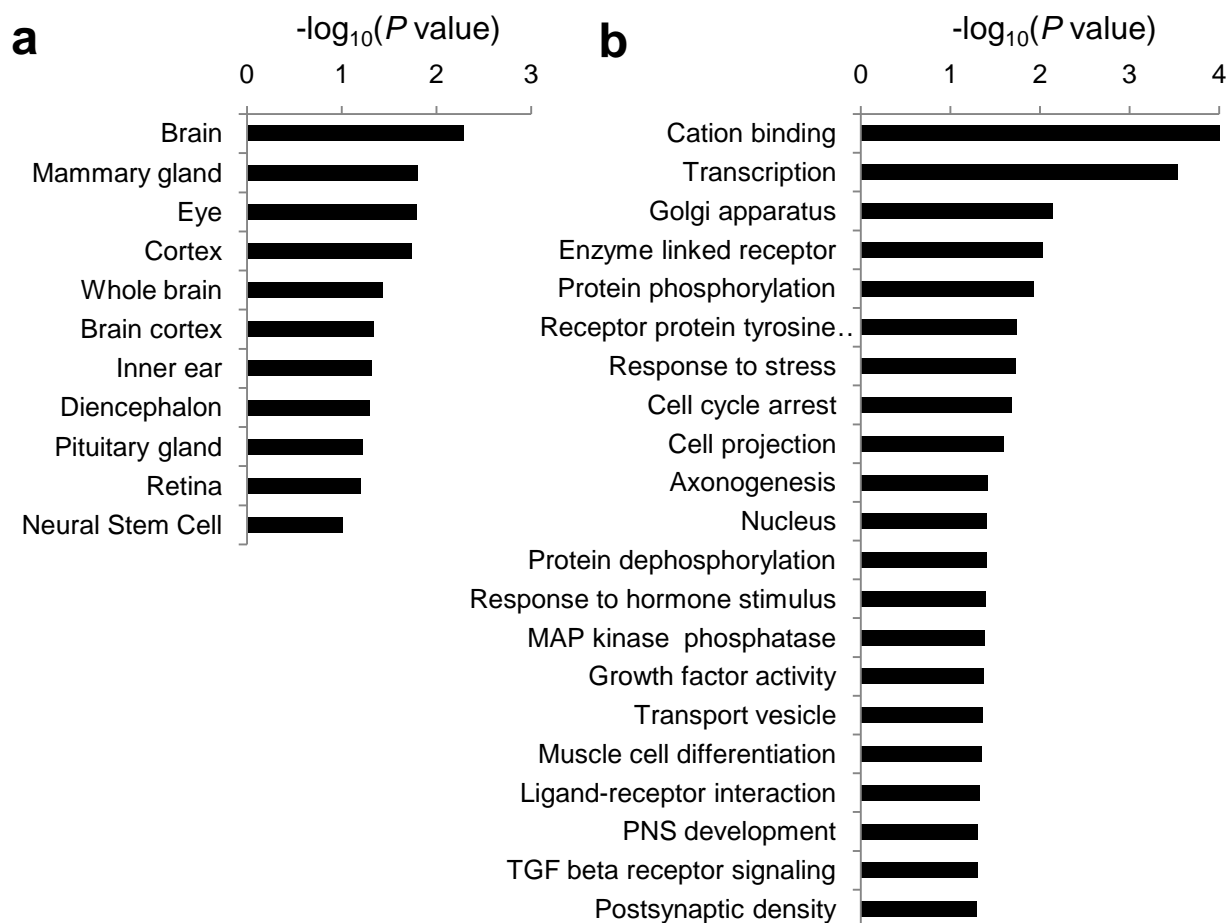

**Supplementary Figure 20.** Functional annotation of differentially expressed genes.  $\log_{10}$ -transformed  $P$  values are shown for tissue expression enrichment (**a**) and functional pathway enrichment (**b**) of genes, which were differentially expressed in adult dentate granule cells *in vivo* between E0 and E4, and targeted by at least one MSCC30+ site.



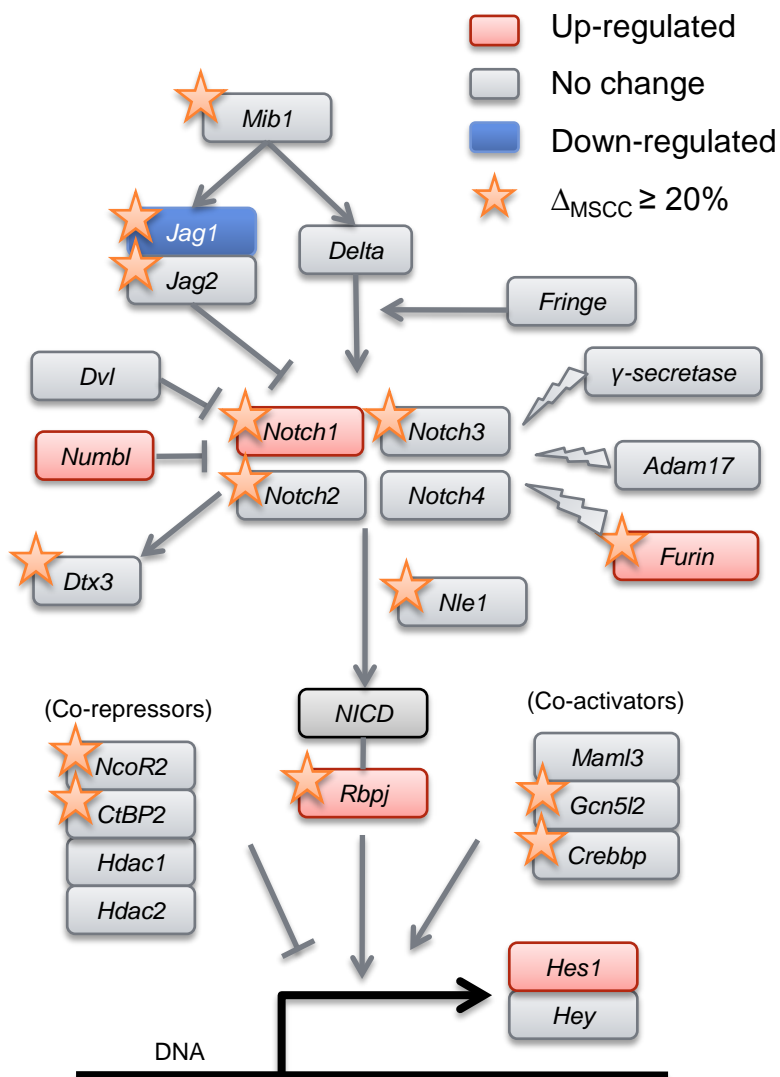

**Supplementary Figure 21.** Notch signalling pathway is a target of activity-induced CpG modification. Shown is a schematic diagram of Notch signalling pathway (modified from KEGG; [www.genome.jp](http://www.genome.jp)). Genes that harbour methylation changes are indicated by stars. Expression changes of individual genes are colour-coded.

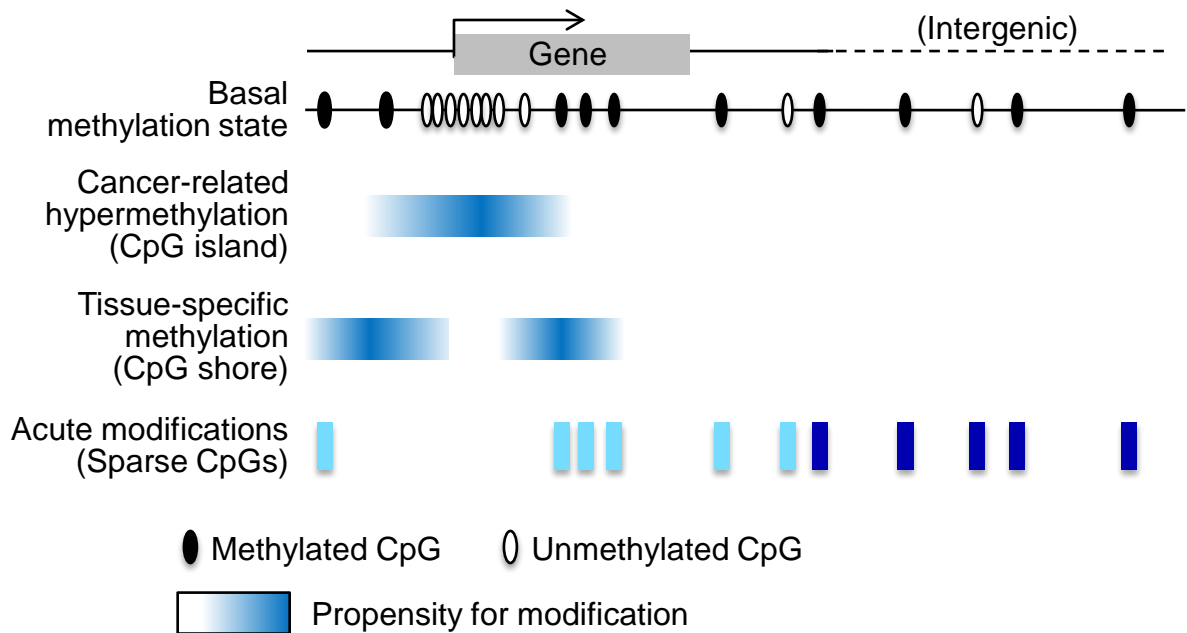

**Supplementary Figure 22.** A model on differential modulation of CpGs in specific genomic contexts in different biological processes. Highly clustered CpGs form CpG islands around TSSs of genes and are mostly unmethylated at the basal state. CpG-island-associated hypermethylation often occurs at tumor suppressor gene promoters in cancer (ref<sup>46</sup>). Recent studies have also identified a subset of CpGs located near CpG islands that are subjected to tissue-specific and/or cancer-related methylation (CpG shores; ref<sup>45</sup>). Sparse CpGs outside CpG islands are preferential targets for stimulus-dependent acute modifications in fully differentiated cells *in vivo*, including both gene bodies and intergenic regions.
